# Psychiatric Services

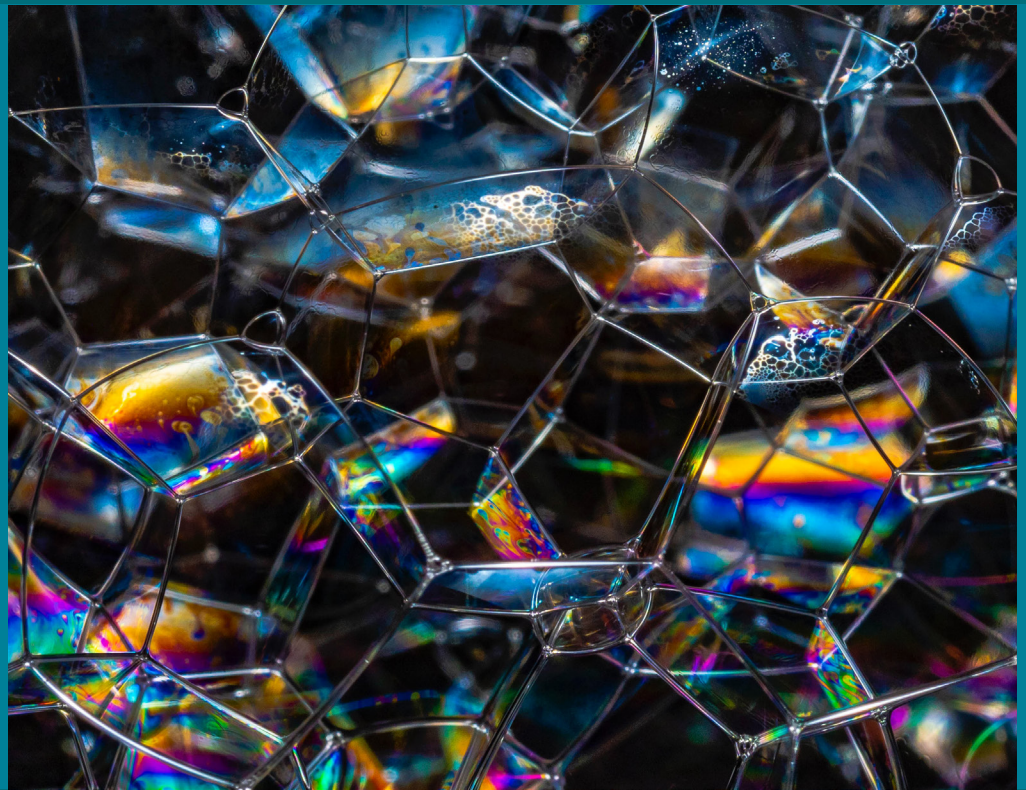

Psychosis Outside the Box: understanding the psychosis experience

Racial-ethnic disparities in outpatient U.S. mental health care

Stigma toward peer specialists on inpatient units

Peer health navigation experiences before and after prison release
