

Searching for  
the perfect  
psychiatric  
career?

## Let APA JobCentral help!

### Manage Your Career

- Browse hundreds of active job listings!
- Create an account to save jobs, store multiple resumes and cover letters and communicate with employers through our internal messaging system.
- Set up multiple job alerts specifying your skills, interests and location to receive e-mails when employers post jobs that match your criteria.

### Recruit for Open Positions

- Post your job in front of thousands of highly qualified psychiatrists.
- Cross promote your job listing in Psychiatric News.
- Search the anonymous resume database to find your ideal candidate.

AMERICAN  
PSYCHIATRIC  
ASSOCIATION

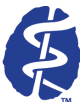

**JOBCENTRAL**  
The Career Hub for Psychiatry

[jobs.psychiatry.org](https://jobs.psychiatry.org)

APA IS SEEKING APPLICANTS  
for the position of **MEDICAL EDITOR-IN-CHIEF** of

# PSYCHIATRIC NEWS

The Medical Editor-in-Chief is responsible for helping to determine the editorial philosophy and medical content of *Psychiatric News* in its print and digital formats and ensuring that the content is accurate, relevant, useful, objective, and balanced. The individual works collaboratively with the APA CEO/Medical Director, Chief of Communications, and Executive Editor.

**Applicants must be APA members** who have administrative experience, are passionate about disseminating news in the field of psychiatry, and are knowledgeable about print and digital communications.

**Deadline for applications**, which should include a letter of interest and a curriculum vitae, is **July 19, 2023**. This is a paid, part-time position.

Applications should be sent by email to  
[editor@psych.org](mailto:editor@psych.org)

See complete position description:

[apapsy.ch/PN\\_editor](http://apapsy.ch/PN_editor)

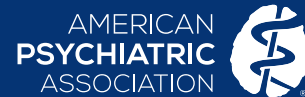

## NEW TITLES FROM AMERICAN PSYCHIATRIC ASSOCIATION PUBLISHING

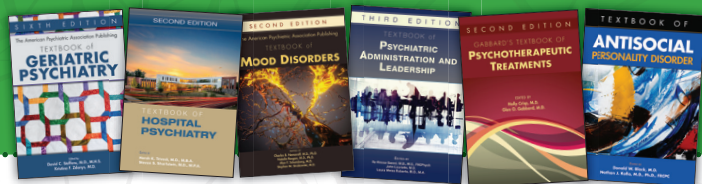

### The American Psychiatric Association Publishing Textbook of Geriatric Psychiatry, Sixth Edition

Edited by David C. Steffens, M.D., M.H.S., and Kristina F. Zdanys, M.D.  
2023 • 848 pages • ISBN 978-1-61537-340-6 • Hardcover • \$200.00 • Item #37340  
2023 • 848 pages • ISBN 978-1-61537-437-3 • eBook • \$160.00 • Item #37437

### Textbook of Hospital Psychiatry, Second Edition

Edited by Harsh K. Trivedi, M.D., M.B.A., and Steven S. Sharfstein, M.D., M.P.A.  
2023 • 703 pages • ISBN 978-1-61537-345-1 • Hardcover • \$155.00 • Item #37345  
2023 • 703 pages • ISBN 978-1-61537-440-3 • eBook • \$124.00 • Item #37440

### The American Psychiatric Association Publishing Textbook of Mood Disorders, Second Edition

Edited by Charles B. Nemeroff, M.D., Ph.D., Alan F. Schatzberg, M.D.,  
Natalie Rasgon, M.D., Ph.D., and Stephen M. Strakowski, M.D.  
2022 • 986 pages • ISBN 978-1-61537-331-4 • Hardcover • \$195.00 • Item #37331  
2022 • 986 pages • ISBN 978-1-61537-452-6 • eBook • \$156.00 • Item #37452

### Textbook of Psychiatric Administration and Leadership, Third Edition

Edited by Sy Saeed, M.D., M.S., FACPpsych, John Lauriello, M.D., and  
Laura Weiss Roberts, M.D., M.A.  
2023 • 544 pages • ISBN 978-1-61537-337-6 • Hardcover • \$154.00 • Item #37337  
2023 • 544 pages • ISBN 978-1-61537-434-2 • eBook • \$123.00 • Item #37434

### Gabbard's Textbook of Psychotherapeutic Treatments, Second Edition

Edited by Holly Crisp, M.D., and Glen O. Gabbard, M.D.  
2023 • 830 pages • ISBN 978-1-61537-326-0 • Hardcover • \$145.00 • Item #37326  
2023 • 830 pages • ISBN 978-1-61537-406-9 • eBook • \$116.00 • Item #37406

### Textbook of Antisocial Personality Disorder

Edited by Donald W. Black, M.D., and Nathan J. Kolla, M.D.  
2022 • 535 pages • ISBN 978-1-61537-323-9 • Hardcover • \$105.00 • Item #37323  
2022 • 535 pages • ISBN 978-1-61537-322-2 • eBook • \$84.00 • Item #37322

# ▶ PODCASTS from APA Publishing

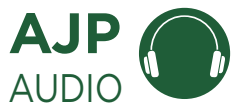

## AJP Audio

Host: Aaron Van Dorn, Online Content Manager

Each episode features an in-depth interview with an author from the most discussed article appearing in the latest issue of *The American Journal of Psychiatry*, along with Editor-in-Chief Ned Kalin highlighting the rest of the issue.

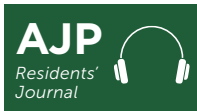

## The American Journal of Psychiatry Residents' Journal

Created by trainees for trainees and featuring interviews covering a wide array of topics including career exploration, personal/professional journeys, clinical practice tips, and more.

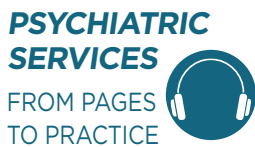

## Psychiatric Services From Pages to Practice

Hosts: Lisa Dixon, M.D., M.P.H., Editor, *Psychiatric Services*, and Josh Berezin, M.D., M.S.

Learn about the latest mental health services research published in *Psychiatric Services* and why it is relevant. Topics include community-based treatment programs, collaborative care, evidence-based treatment and service delivery, criminal and social justice, policy analysis, and more.

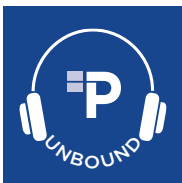

## Psychiatry Unbound

Host: Laura Roberts, M.D., M.A., Editor-in-Chief, APA Publishing Books

APA Publishing's Books podcast offers the opportunity to hear the voices behind the most prominent psychiatric scholarship in the field today. Learn about important topics in the field of psychiatry and see how our authors are making an impact in clinical settings throughout the world.

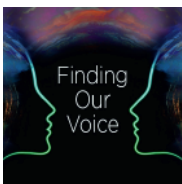

## Finding Our Voice

Host: Sanya Virani, MBBS, MPH

*Finding Our Voice* brings the viewpoints and opinions of the next generation of psychiatrists—including residents, fellows, and early career psychiatrists—to the forefront. Topics covered include systemic racism and social determinants.

Subscribe Today!

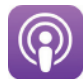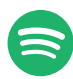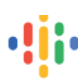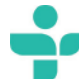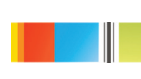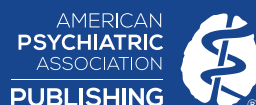

Source: https://psychiatryonline.org/doi/suppl/10.1176/ps.2023.74.issue-7/suppl_file/back.pdf
